# Supplementary material for: Widespread FUS mislocalization is a molecular hallmark of amyotrophic lateral sclerosis
Source: PubMed Central journal article supplement (PMC6735815; doi:10.1093/brain/awz217), 2019-08-01
Supplement: awz217_supplementary_data.pdf [file awz217_supplementary_data.pdf]

## Supplementary information

### Supplementary methods

#### Derivation of Human Fibroblasts and iPSC

Dermal fibroblasts were cultured in OptiMEM +10% FCS medium. The following episomal plasmids were transfected for iPSC generation: pCXLE hOct4 shp53, pCXLE hSK, and pCXLE hUL (Addgene), as previously reported ([Okita \*et al.\*, 2011](#)). Details of the lines used in this study are provided in Table S1. Three of the control lines used (control 2 and control 3, and control 5) are commercially available and were purchased from Coriell (cat. number ND41866\*C), ThermoFisher Scientific (cat. number A18945) and Cedars Sinai (Cat.number CS02iCTR-NTn4) respectively.

#### Cell culture and motor neuron differentiation

Induced PSCs were maintained on Geltrex (Life Technologies) with Essential 8 Medium media (Life Technologies), and passaged using EDTA (Life Technologies, 0.5mM). All cell cultures were maintained at 37°C and 5% carbon dioxide. For motor neuron (MN) differentiation, iPSCs were first differentiated to neuroepithelium by plating to 100% confluency in chemically defined medium consisting of DMEM/F12 Glutamax, Neurobasal, L-Glutamine, N2 supplement, non-essential amino acids, B27 supplement,  $\beta$ -mercaptoethanol (all from Life Technologies) and insulin (Sigma). Treatment with small molecules from day 0-7 was as follows: 1 $\mu$ M Dorsomorphin (Millipore), 2 $\mu$ M SB431542 (Tocris Bioscience), and 3.3 $\mu$ M CHIR99021 (Miltenyi Biotec). At day 8, cells patterned for 7 days with 0.5 $\mu$ M retinoic acid and 1 $\mu$ M Purmorphamine. At day 14 spinal cord MN precursors were treated with 0.1 $\mu$ M Purmorphamine for a further 4 days before being terminally differentiated for >10 days in 0.1  $\mu$ M Compound E (Enzo Life Sciences) to promote cell cycle exit. Throughout the neural conversion and patterning phase (D0-18) the neuroepithelial layer was enzymatically dissociated twice (at D4-5 and D10-12) using dispase (GIBCO, 1 mg ml<sup>-1</sup>). At relevant timepoints cells were harvested for RNA extraction or fixed in 4% paraformaldehyde for immunolabelling.

**Supplementary table 1. Details of iPSC lines used in this study**

| iPSC line     | Mutation present | Age of Donor | Age at disease onset | Sex of Donor |
|---------------|------------------|--------------|----------------------|--------------|
| <b>CTRL 1</b> | None             | 78           | N/A                  | Male         |
| <b>CTRL 2</b> | None             | 64           | N/A                  | Male         |
| <b>CTRL 3</b> | None             | Unknown      | N/A                  | Female       |
| <b>CTRL 4</b> | None             | 51           | N/A                  | Female       |
| <b>CTRL 5</b> | None             | 51           | N/A                  | Male         |
| <b>MUT 1</b>  | VCP R155C        | 43           | 40                   | Female       |
| <b>MUT 2</b>  | VCP R155C        | 43           | 40                   | Female       |
| <b>MUT 3</b>  | VCP R191Q        | 42           | 36                   | Male         |
| <b>MUT 4</b>  | VCP R191Q        | 42           | 36                   | Male         |

**Supplementary table 2. Post-mortem tissue case information.**

| Age | Gender | Category | Cause of death                             | Post mortem delay (hours) |
|-----|--------|----------|--------------------------------------------|---------------------------|
| 71  | M      | Control  | Burst aortic aneurysm.                     | 25                        |
| 68  | F      | Control  | Colorectal metastatic cancer               | 23                        |
| 68  | M      | Control  | Heart disease                              | 40                        |
| 70  | M      | Control  | Bronchopneumonia and heart failure         | 53                        |
| 77  | M      | Control  | Pulmonary fibrosis                         | 32                        |
| 80  | F      | Control  | Pulmonary embolism                         | 24                        |
| 81  | M      | Control  | Lung carcinoma; bilateral bronchopneumonia | 10                        |
| 67  | F      | Control  | Bronchopneumonia                           | 34                        |
| 69  | M      | sALS     | MND & stage 2 respiratory failure.         | 19                        |
| 61  | M      | sALS     | MND.                                       | 29                        |
| 74  | F      | sALS     | MND.                                       | 27                        |
| 70  | M      | sALS     | MND.                                       | 40                        |
| 81  | F      | sALS     | MND.                                       | 33                        |
| 65  | F      | sALS     | MND                                        | 30                        |
| 70  | F      | sALS     | MND                                        | 26                        |
| 58  | M      | sALS     | MND                                        | 49                        |
| 69  | M      | sALS     | MND                                        | 19                        |
| 66  | F      | sALS     | MND                                        | 15                        |
| 77  | F      | sALS     | Bronchopneumonia and MND                   | 34                        |
| 80  | F      | sALS     | MND                                        | 12                        |
